1

2

3

4 **Lineage tracing axial progenitors using Nkx1.2CreER<sup>T2</sup>**  
5 **mice defines their trunk and tail contributions**

6

7 Aida Rodrigo Albors, Pamela A. Halley, Kate G. Storey<sup>‡</sup>

8

9 Neural Development Group, Division of Cell and Developmental Biology

10 School of Life Sciences, University of Dundee

11 Dow Street, DD1 5EH

12 Dundee, UK

13

14 <sup>‡</sup> Corresponding author: [k.g.storey@dundee.ac.uk](mailto:k.g.storey@dundee.ac.uk)

15

16

17 Running title: Lineage tracing axial progenitors

18

19 Keywords: axial progenitors, neuromesodermal progenitors, NMP, Nkx1.2, genetic lineage tracing, mouse  
20 embryo, caudal epiblast, tail bud

21 **Abstract**

22 The vertebrate body forms by continuous generation of new tissue from progenitors at the posterior end of  
23 the embryo. In mice, these axial progenitors initially reside in the epiblast, from where they form the trunk;  
24 and later relocate to the chordo-neural hinge of the tail bud to form the tail. Among them, a small group of  
25 bipotent neuromesodermal progenitors (NMPs) are thought to generate the spinal cord and paraxial  
26 mesoderm to the end of axis elongation. The study of these progenitors, however, has proven challenging  
27 *in vivo* due to their small numbers and dynamic nature, and the lack of a unique molecular marker to identify  
28 them. Here, we report the generation of the *Nkx1.2*CreER<sup>T2</sup> transgenic mouse line in which the endogenous  
29 *Nkx1.2* promoter drives tamoxifen-inducible CreER<sup>T2</sup> recombinase. We show that *Nkx1.2*CreER<sup>T2</sup> targets  
30 axial progenitors, including NMPs and early neural and mesodermal progenitors. Using a YFP reporter, we  
31 demonstrate that *Nkx1.2*-expressing epiblast cells contribute to all three germ layers, mostly neuroectoderm  
32 and mesoderm excluding notochord; and continue contributing neural and paraxial mesoderm tissues from  
33 the tail bud. This study identifies the *Nkx1.2*-expressing cell population as the source of most trunk and tail  
34 tissues in the mouse; and provides a key tool to genetically label and manipulate this progenitor population  
35 *in vivo*.

36

## 37 Introduction

38 The vertebrate body forms progressively in a head-to-tail direction from progenitors located at the posterior  
39 end of the embryo (reviewed in (Kimelman, 2016; Neijts et al., 2013; Wilson et al., 2009)). In mice, these  
40 progenitors initially reside in the epiblast, from where they generate most of the organs of the trunk; and  
41 later relocate to the tail bud, from where they generate the tail. The process is thought to be partly fuelled  
42 by a small pool of bipotential progenitors with self-renewing capability, the so-called neuromesodermal  
43 progenitors (NMPs) (Cambray and Wilson, 2002, 2007; Tsakiridis and Wilson, 2015; Tzouanacou et al.,  
44 2009). NMPs give rise to the neural and mesodermal progenitors that form the spinal cord and paraxial  
45 mesoderm derivatives (e.g. bones, cartilage, muscle, dermis) of the trunk and tail (reviewed in (Henrique  
46 et al., 2015; Steventon and Martinez Arias, 2017)). Lineage tracing studies of small groups of cells in  
47 mouse embryos at embryonic day (E) 8.5 have shown that both the neural and paraxial mesoderm tissues  
48 of the trunk originate from the epiblast between the node and the anterior primitive streak (the node-streak  
49 border or NSB) and the caudal lateral epiblast (CLE) (Cambray and Wilson, 2007; Wymeersch et al.,  
50 2016). During the transition from trunk to tail development, this neuro-mesodermal (NM) potential relocates  
51 to the chordo-neural hinge (CNH) – the region of the tail bud where the neural tube overlays the posterior  
52 end of the notochord (Cambray and Wilson, 2002; McGrew et al., 2008; Wilson and Beddington, 1996).  
53 These findings suggest that NMPs first reside within the NSB and CLE and during the transition from trunk  
54 to tail development relocate to the CNH.

55 Molecularly, NMPs have been defined by co-expression of the stem cell and neural transcription  
56 factor *Sox2* and the mesodermal transcription factor *T* (*Brachyury*) (Garriock et al., 2015; Tsakiridis et al.,  
57 2014; Wymeersch et al., 2016). However, even though cells that co-express *Sox2* and *T* coincide with NM-  
58 fated regions, co-expression of *Sox2* and *T* is not a feature unique to NMPs (Wymeersch et al., 2016).  
59 Recently, two studies revealed a more complete molecular signature of NMPs and their immediate  
60 descendants, early neural and mesodermal progenitors, using single-cell RNA-sequencing technologies  
61 (Gouti et al., 2017; Koch et al., 2017). Perhaps not surprisingly, both studies showed that the CLE cell  
62 population (Gouti et al., 2017) and cells co-expressing *Sox2* and *T* at E8.5 (Koch et al., 2017) are rather  
63 heterogeneous and include, based on their molecular features, NMPs and early neural and mesodermal  
64 progenitors. NMPs at E8.5 express *Sox2*, *T*, *Nkx1.2*, *Cdx2* and *Cdx4*, while NMPs at E9.5 and NMPs  
65 undergoing lineage choice express NMP marker genes plus *Tbx6* at levels that reflect their fate choice  
66 (Gouti et al., 2017; Koch et al., 2017). Accordingly, early mesoderm progenitors express *T* and *Tbx6* and  
67 at decreasing levels *Sox2* and *Nkx1.2*, while early neural progenitors express *Sox2*, and at decreasing  
68 levels *Nkx1.2* and *T*. Already committed presomitic mesoderm cells express *Mesn1* and *Tbx6* but have  
69 repressed *Sox2* and *Nkx1.2*, while neural progenitors express high *Sox2* but have now repressed *Nkx1.2*  
70 and mesodermal genes (Gouti et al., 2017; Koch et al., 2017). From these data, it emerges that *Nkx1.2*  
71 marks progenitor cells with neural and mesodermal potential. *Nkx1.2* has also been used to identify *in*  
72 *vitro*-derived NMPs (Edri et al., 2018; Gouti et al., 2014; Sasai et al., 2014; Tsakiridis et al., 2014; Verrier  
73 et al., 2017). *Nkx1.2*, previously *Sax1* in the chick, is a member of the small NK-1 class of homeobox  
74 genes. *Nkx1.2* is widely conserved across species and its expression pattern has been characterised in  
75 chick (Rangini et al., 1989; Spann et al., 1994), mouse (Schubert et al., 1995), and zebrafish (Bae et al.,  
76 2004). However, the identity of *Nkx1.2*-expressing cells and their contributions to the developing mouse  
77 embryo have not been specifically characterised.

78 Here, we present the first detailed description of the expression pattern of *Nkx1.2* in the mouse  
79 embryo and show that it largely overlaps with the posterior growth zone and regions thought to harbour  
80 NMPs and early neural and mesodermal progenitors. We describe the generation and characterisation of

81 the *Nkx1.2*CreER<sup>T2</sup> transgenic mouse line in which tamoxifen-inducible CreER<sup>T2</sup> recombinase is driven  
82 under the control of the endogenous *Nkx1.2* promoter. We then demonstrate that this line can be used to  
83 manipulate gene expression specifically in cells expressing *Nkx1.2* in a temporally-controlled manner. Using  
84 a YFP reporter, we trace and define the lineages of the *Nkx1.2*-expressing cell population at different  
85 developmental stages and find that this progenitor population is dynamic, changing as development  
86 proceeds to supply most tissues of the trunk and tail in the mouse.

87

88

## 89 **Results**

### 90 ***Nkx1.2* is expressed in the posterior growth zone throughout body axis elongation**

91 To document in detail *Nkx1.2* expression in the mouse embryo, we carried out whole-mount RNA in situ  
92 hybridization and then localised *Nkx1.2* transcripts to specific cell populations in serial transverse sections.  
93 As the body develops in a head-to-tail sequence, sections from the posterior end of the embryo represent  
94 more undifferentiated structures than more anterior sections. In agreement with a previous report  
95 (Schubert et al., 1995), *Nkx1.2* transcripts were first detected around embryonic day (E) 7-7.5 in the NSB  
96 as well as in and alongside the primitive streak, in cells of the CLE (Figure 1A-C). This coincides with the  
97 emergence of the node and the time and regions in which NMPs first arise during embryonic development  
98 (Wymeersch et al., 2016). At E8.5, *Nkx1.2* expression remained highest in epiblast cells in the node region  
99 and CLE just posterior to the node (Figure 1D, E, Eb, Ec). *Nkx1.2* was expressed at lower levels in the  
100 primitive streak, in cells that ingress to form mesoderm (Figure 1Ec). Anterior to the node, *Nkx1.2* was also  
101 expressed in the neural plate, although at lower levels in the midline/floor plate (Figure 1D, E, Ea). The  
102 expression pattern and relative levels of *Nkx1.2* in the E8.5 embryo combined with lineage tracing data  
103 (Cambray and Wilson, 2007; Wymeersch et al., 2016) support single-cell transcriptomics data suggesting  
104 that *Nkx1.2* is highly expressed in NMPs and expressed at lower levels in early neural and mesodermal  
105 progenitors (Gouti et al., 2017; Koch et al., 2017). By E9.5 the most anterior *Nkx1.2*-expressing cells have  
106 begun to form a neural tube (Figure 1F, Fa, Fb). Posteriorly, transcripts remained in epiblast cells around  
107 the closing posterior neuropore but were for the first time detected at lower levels in mesenchymal cells  
108 ingressing through the last remnants of the primitive streak as the tail bud forms (Figure 1Fc, Fd). In the  
109 tail of E10.5 embryos, *Nkx1.2* transcripts continued to be detected in most newly formed neural tube  
110 (Figure 1G, Ga-Gc) and were also found in the CNH region (Figure 1Gb). Here, *Nkx1.2* was expressed in  
111 the neural tube and in a mesenchymal cell group continuous with the ventral neural tube, but not in the  
112 notochord component of the CNH (Figure 1Gb). Posteriorly, *Nkx1.2* was also expressed in the contiguous  
113 dorsal tail bud mesenchyme, albeit at lower levels (Figure 1Gd). Intriguingly, the appearance of this novel  
114 mesenchymal *Nkx1.2* domain coincides with the transition from primitive streak to tail bud-driven growth  
115 and formation of neural tissue by secondary neurulation, which involves a mesenchymal-to-epithelial  
116 transition (Beck, 2015; Lowery and Sive, 2004; Schoenwolf, 1984). At E11.5, *Nkx1.2* transcripts were still  
117 detected in the newly formed neural tube and contiguous tail bud mesenchyme (Figure 1H). At all stages,  
118 the anterior limit of *Nkx1.2* expression was in the neural tube around the level of the last formed somite  
119 (Figure 1D-H). At E12.5, when elongation of the tail is coming to a halt, *Nkx1.2* expression faded away  
120 (Figure 1I). Outside of the posterior end of the embryo, *Nkx1.2* transcripts appeared at this stage in a  
121 subpopulation of motor neurons in the hindbrain and spinal cord and in the medial longitudinal fascicle of  
122 the midbrain (Schubert et al., 1995) (Figure S1).

123 Taken together, these data show that *Nkx1.2* expression marks the posterior growth zone and  
 124 regions thought to harbour NMPs and early neural and mesodermal progenitors throughout body axis  
 125 elongation.  
 126

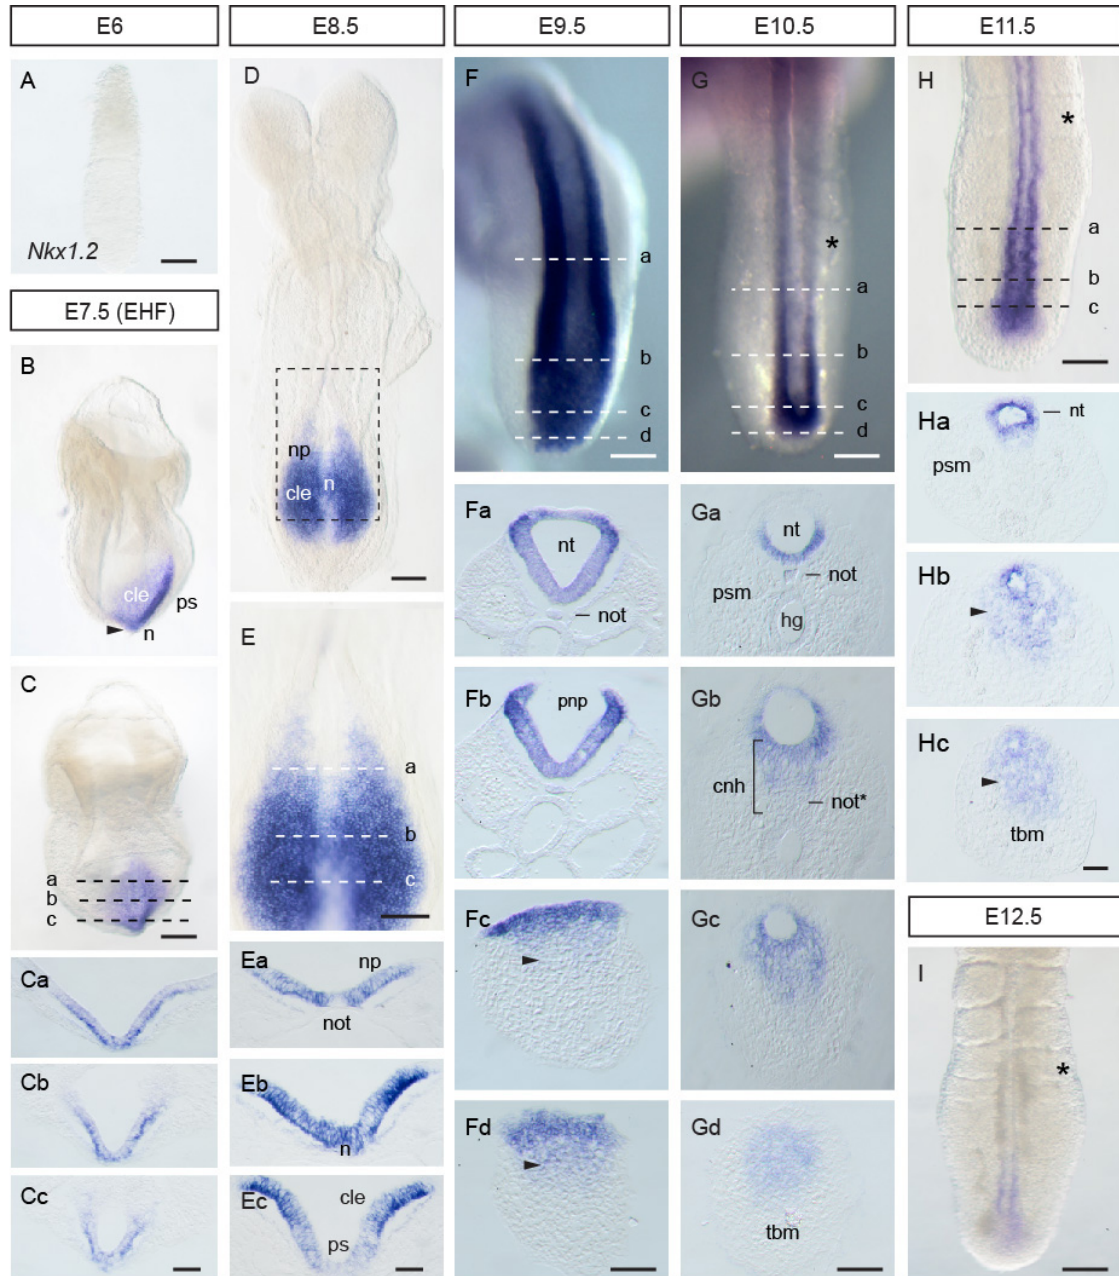

127  
 128 **Figure 1 Expression of *Nkx1.2* in the developing mouse embryo.** (A) E6.0 embryo (n=4 embryos). (B) Lateral  
 129 and (C) posterior views of an E7.5 embryo (early head fold) (n=4 embryos). (Ca-Cc) Transverse sections through  
 130 the regions indicated in C. (D) E8.5 embryo (8-10 somites) and (E) higher magnification of the posterior end of  
 131 the embryo (n=4 embryos). (Ea-Ec) Transverse sections through the regions indicated in E. (F) Dorsal view of  
 132 the posterior end of an E9.5 embryo (n=4 embryos). (Fa-Fd) Transverse sections through the regions indicated  
 133 in F. (G) Dorsal view of the tail end of an E10.5 embryo (n=9 embryos). (Ga-Gd) Transverse sections through the  
 134 regions indicated in G. (H) Dorsal view of the tail end of an E11.5 embryo (n=4 embryos). (Ha-Hc) Transverse  
 135 sections through the regions indicated in H. (I) Dorsal view of the tail end of an E12.5 embryo (n=4 embryos).  
 136 The arrowheads in (Fc-Fd) and (Hb-Hc) indicate the mesenchymal cell group expressing *Nkx1.2* in the tail bud.  
 137 The asterisks in (G), (H), and (I) indicate the last formed somite. cle, caudal lateral epiblast; ps, primitive streak;  
 138 np, neural plate; n, node; np, neural plate; not, notochord; not\*, notochord end; nt, neural tube; pnp, posterior  
 139 neuropore; psm, presomitic mesoderm; hg, hindgut; cnh, chordoneural hinge; tbm, tail bud mesenchyme. Scale  
 140 bars in whole-mount embryos, 100  $\mu$ m; scale bars in transverse sections, 50  $\mu$ m.  
 141

142 ***Nkx1.2* regions co-localise with SOX2<sup>+</sup>T<sup>+</sup> regions fated for neural and mesodermal lineages**

143 NMPs are usually identified *in vivo* by their location and co-expression of the neural transcription factor  
144 SOX2 and the mesodermal transcription factor T (Garriock et al., 2015; Tsakiridis et al., 2014; Wymeersch  
145 et al., 2016). The relative levels of these two factors correlate with the fate of NMP descendants: neural-  
146 fated NMPs gradually increase *Sox2* and decrease *T* expression, while mesoderm-fated NMPs increase *T*  
147 and decrease *Sox2* (Gouti et al., 2017; Koch et al., 2017; Wymeersch et al., 2016). To better place NMP  
148 cells and their immediate descendants within *Nkx1.2* regions, we carried out SOX2 and T  
149 immunofluorescence on transverse sections of mouse embryos. Because embryos display a highly  
150 characteristic spatial patterning of tissues along the developing body axis, we used morphological features  
151 to align sections with schematic cartoons of the *Nkx1.2* regions defined above (Figure 1). We focused the  
152 analysis around the regions known to harbour early and late NMPs – the NSB and CLE at E8.5 and the  
153 CNH at E10.5, respectively.

154 In agreement with previous reports (Garriock et al., 2015; Tsakiridis et al., 2014; Wymeersch et  
155 al., 2016), SOX2<sup>+</sup>T<sup>+</sup> cells were found at E8.5 at the midline epiblast of the NSB and posteriorly, in the CLE  
156 and primitive streak (Figure 2A). Here, T levels were higher in the midline epiblast and primitive streak  
157 than in the CLE (Figure 2A) (Wymeersch et al., 2016). Moreover, as recently reported (Javali et al., 2017),  
158 TBX6 could be detected in high-T regions: the primitive streak and primitive streak epiblast as well as in  
159 the presomitic mesoderm; but not in the NSB epiblast, CLE or neural plate (Figure S2). *Nkx1.2*, however,  
160 was expressed across these regions albeit at higher levels in the in the NSB epiblast and CLE than in the  
161 primitive streak epiblast (Figure 1Ec and 2A). Taken together, these molecular features suggest that the  
162 *Nkx1.2*-expressing cell population at E8.5 includes putative NMPs (SOX2<sup>+</sup>T<sup>+</sup>TBX6<sup>-</sup>*Nkx1.2*<sup>high</sup>) and early  
163 neural (SOX<sup>high</sup>T<sup>-</sup>TBX6<sup>-</sup>*Nkx1.2*<sup>low</sup>) and mesodermal (SOX2<sup>low</sup>T<sup>high</sup>TBX6<sup>+</sup>*Nkx1.2*<sup>low</sup>) progenitors.

164 Between E9.5 and E10.5 NMPs relocate to the CNH region of the tail bud, but their precise  
165 location remains unclear. SOX2 and T co-expression is not unique for NMPs in the CNH region: node-  
166 derived notochord progenitors and hindgut cells also co-express SOX2 and T, but they are not NMPs  
167 (Figure 2B). However, combining SOX2 and T with *Nkx1.2* expression data in the tissue context we could  
168 identify as putative NMPs and/or NMP descendants the cells in the dorsal half of the CNH. These included  
169 the neural tube and the mesenchymal cells right below the neural tube (Figure 2B). Given the co-  
170 expression of neural and mesodermal genes, we propose to name this medial mesenchymal cell  
171 population the neuromesodermal lip (NML). In contrast, SOX2<sup>+</sup>T<sup>+</sup> cells in the ventral half of the CNH  
172 express T at higher levels and no or undetectable *Nkx1.2* and thus comprise mostly notochord progenitors  
173 (Figure 2B). In agreement with a recent report (Javali et al., 2017), we found low but detectable levels of  
174 TBX6 protein in all SOX2<sup>+</sup> cells in the CNH region, including *Nkx1.2*-expressing cells in the neural tube  
175 (higher in the ventral half) and in the NML (Figure S2). This molecular signature of the ventral half of the  
176 neural tube and NML (SOX2<sup>+</sup>T<sup>+</sup>TBX6<sup>low</sup>*Nkx1.2*<sup>low</sup>) is consistent with the molecular signature of E9.5 tail  
177 bud NMPs proposed by single-cell transcriptomics data (Gouti et al., 2017) and what Koch and colleagues  
178 proposed to be NMPs undergoing lineage choice (Koch et al., 2017). Posterior to the CNH, cells of the tail  
179 bud mesenchyme also co-express SOX2 and T proteins and low levels of *Nkx1.2* transcripts, resembling  
180 cells in the primitive streak epiblast at E8.5 (Figure 2). Lineage tracing of dorsal tail bud mesenchyme  
181 (Cambray and Wilson, 2002; McGrew et al., 2008) and the molecular signature of this cell population,  
182 including TBX6 (Figure S2), suggest that *Nkx1.2*-expressing cells in the tail bud mesenchyme (*Nkx1.2*<sup>low</sup>  
183 SOX2<sup>low</sup>T<sup>high</sup>TBX6<sup>+</sup>) are early mesoderm progenitors. As expected, presomitic mesoderm cells express  
184 high levels of T and TBX6 and neither SOX2 or *Nkx1.2* (Figure 2B, Figure S2) (Chalamalasetty et al.,  
185 2014; Gouti et al., 2017).

186 Taken all together, these data provide a refined map of the *in vivo* location of NMPs and NMP  
 187 immediate descendants throughout body axis elongation, and put forward *Nkx1.2* as reliable marker for  
 188 these dynamic progenitor populations.

189

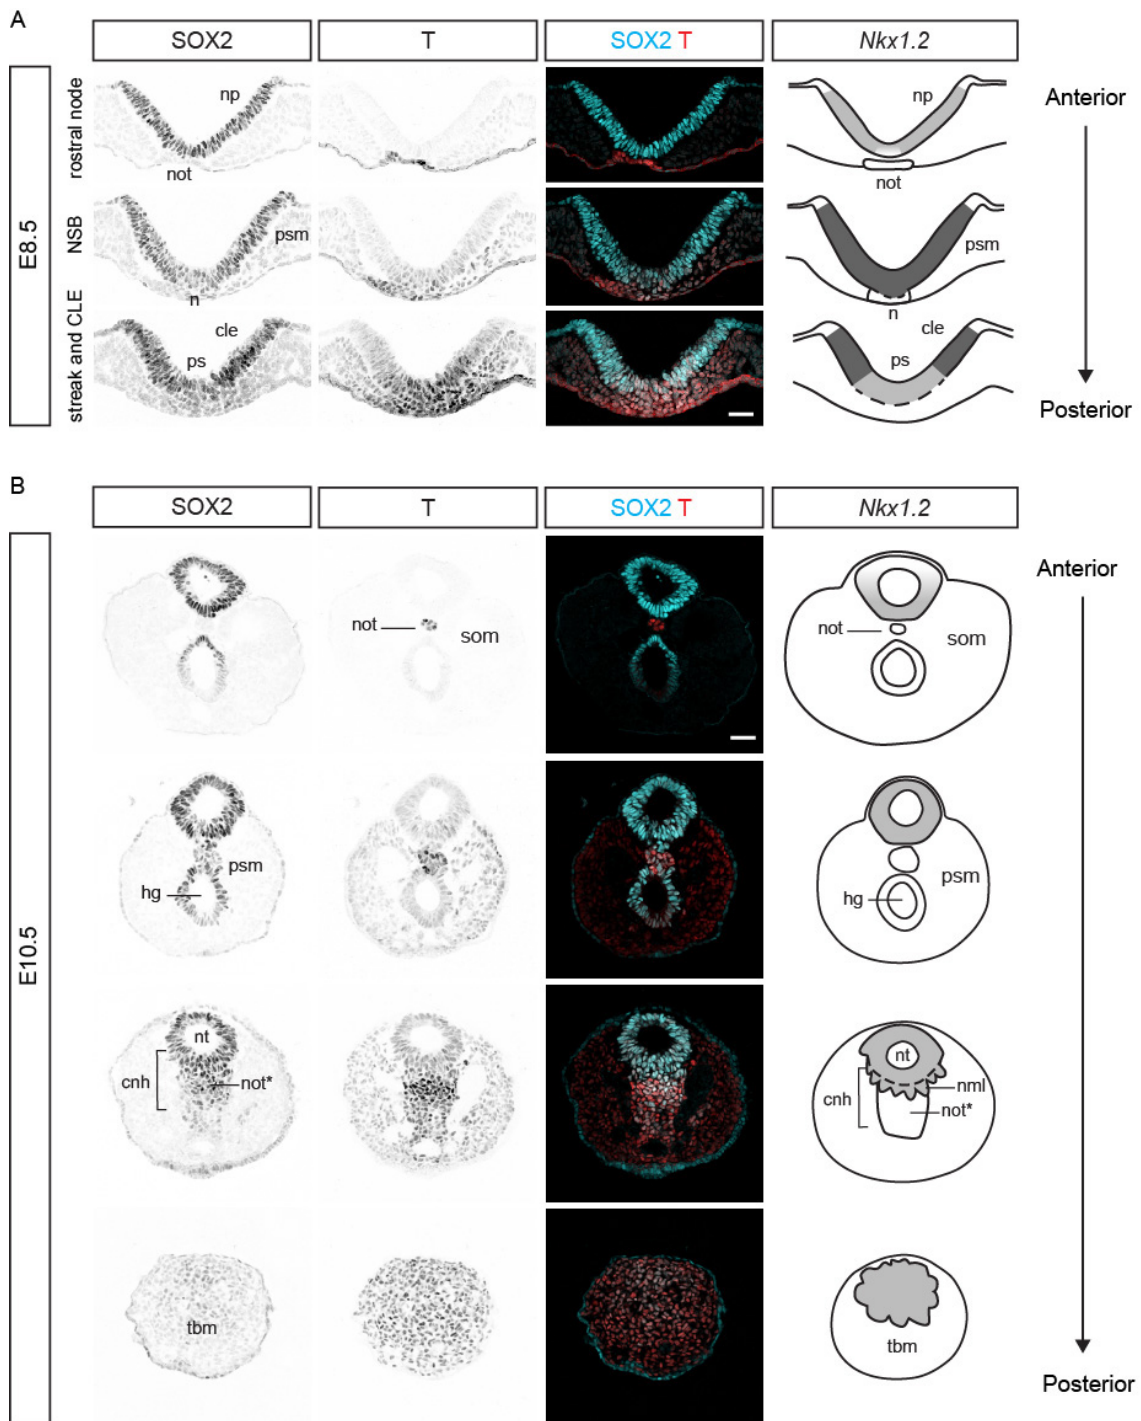

190

191 **Figure 2 SOX2 and T co-expression within *Nkx1.2* regions.** (A) Transverse sections across the rostral node,  
 192 NSB, and CLE of an E8.5 embryo immunolabelled for SOX2 and T (n=4 embryos). (B) Transverse sections  
 193 across the tail end of an E10.5 embryo immunolabelled for SOX2 and T (n=7 embryos). The cartoons in (A) and  
 194 (B) depict the expression pattern of *Nkx1.2* (as shown in Figure 1). The different levels of *Nkx1.2* expression  
 195 (based on *in situ* hybridisation signal) are represented by different grey intensities (light grey, low; dark grey,  
 196 high). The dashed lines delineate regions not limited by basement membrane. Abbreviations are the same as in  
 197 Figure 1. som, somite; nml, neuromesodermal lip. Scale bars, 50  $\mu$ m.

198

199 **Generation of the *Nkx1.2*CreER<sup>T2</sup> mouse line**

200 To label and manipulate specifically *Nkx1.2*-expressing cells and thus potentially NMPs and early neural  
 201 and mesodermal progenitors in a temporally-controlled manner, we set out to generate a transgenic  
 202 mouse line in which the expression of CreER<sup>T2</sup> recombinase is driven under the control of the *Nkx1.2*  
 203 promoter. The CreER<sup>T2</sup> sequence was knocked in to the *Nkx1.2* locus in C57BL/6 ES cells using standard  
 204 targeting methods by Taconic Biosciences. The strategy used to generate the conditional transgenic  
 205 mouse is summarised in Figure 3. Taconic provided two breeding pairs of heterozygous C57BL/6-  
 206 *Nkx1.2*<sup>tm2296(Cre-ER(T2))Arte</sup> (*Nkx1.2*CreER<sup>T2</sup>) mice. These mice carried a puromycin-expressing cassette  
 207 flanked by FLP sites, which was removed upon crossing to Flp-expressing mice. The resulting animals  
 208 were then bred to homozygosity to establish a breeding colony. Knocking out *Nkx1.2* did not generate a  
 209 phenotype in either heterozygous or homozygous mice, likely due to functional redundancy with the  
 210 paralogous gene *Nkx1.1* (Bober et al., 1994) (Frank Schubert and Peter Gruss personal communication).  
 211 Here, we substantiate this unpublished finding with the maintenance of a homozygous *Nkx1.2*CreER<sup>T2</sup>  
 212 transgenic line for at least 9 generations without deleterious effects.

213

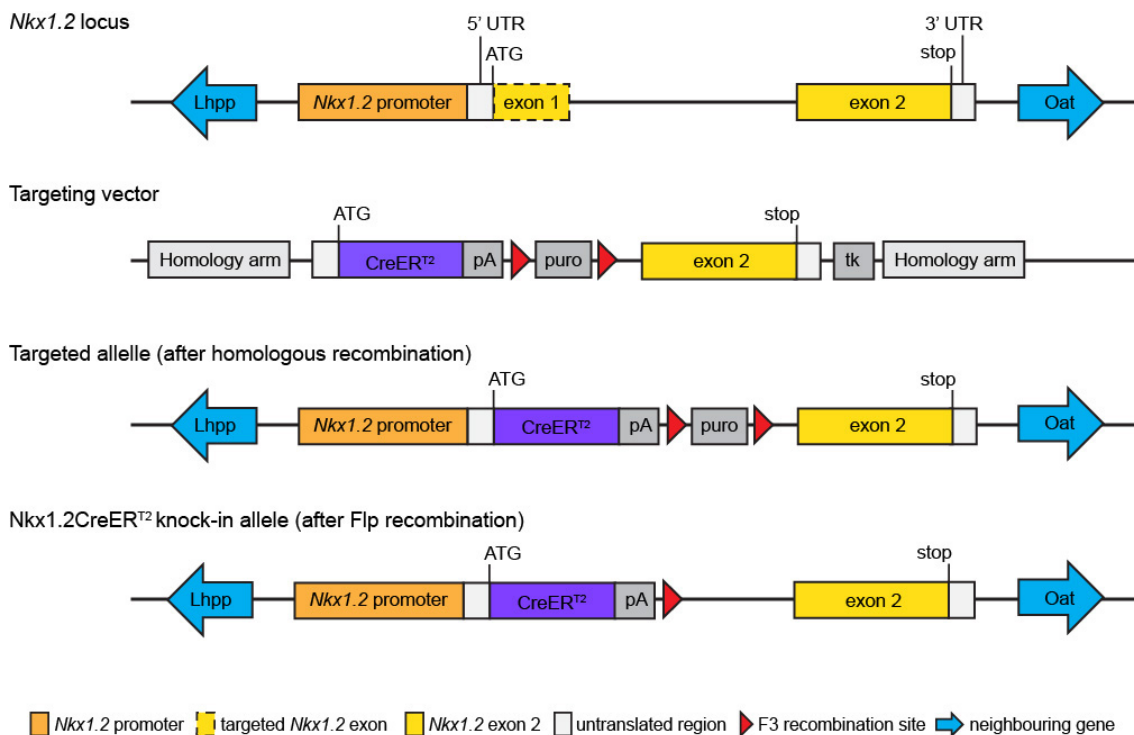

214

215 **Figure 3 Strategy to knock-in the CreER<sup>T2</sup> cassette into the *Nkx1.2* locus.** *Nkx1.2* locus and targeting vector  
 216 designed to replace the *Nkx1.2* coding sequence in exon 1 as well as the splice donor site at the junction  
 217 between exon 1 and intron 1 with a cassette containing the open reading frame (ORF) of CreER<sup>T2</sup>. A  
 218 polyadenylation site (pA) was inserted 3' of the CreER<sup>T2</sup> ORF to terminate transcription. Positive clones were  
 219 isolated using positive (puromycin, puro) as well as negative (thymidine kinase, tk) selection. Recombinant  
 220 clones were injected into mouse blastocysts and transferred to mice. The resulting chimeric mice were bred to  
 221 Flp deleter mice that ubiquitously express Flp recombinase to remove the puromycin selection marker to  
 222 generate the *Nkx1.2*CreER<sup>T2</sup> line.

223

224 Next, to fluorescently label *Nkx1.2*-expressing cells in developing embryos, homozygous  
 225 *Nkx1.2*CreER<sup>T2</sup> females were mated with heterozygous or homozygous males harbouring a *loxP*-flanked  
 226 stop sequence upstream of a EYFP reporter gene under the control of the ubiquitous *ROSA26* promoter  
 227 (R26R-EYFP mice) (Srinivas et al., 2001). In the resulting *Nkx1.2*CreER<sup>T2</sup> floxed EYFP mice  
 228 (*Nkx1.2*CreER<sup>T2</sup>/YFP), tamoxifen administration leads to CreER<sup>T2</sup>-mediated recombination of the *loxP*-



229 flanked stop sequence and expression of the YFP reporter in *Nkx1.2*-expressing cells and their progeny.  
230 We confirmed that *Nkx1.2*CreER<sup>T2</sup> faithfully drives transgene expression in the endogenous *Nkx1.2*  
231 regions and that only low levels of spontaneous recombination occur in the absence of tamoxifen, but  
232 always within canonical *Nkx1.2* regions (Figure S3). Thus, overall, tamoxifen-induced CreER<sup>T2</sup>-mediated  
233 recombination leads to faithful YFP-labelling of *Nkx1.2*-expressing cells in the *Nkx1.2*CreER<sup>T2</sup>/YFP  
234 reporter mouse.

235

### 236 ***Nkx1.2*CreER<sup>T2</sup>/YFP labels SOX2 and T co-expressing cells and their progeny**

237 To establish which cells are labelled with the *Nkx1.2*CreER<sup>T2</sup>/YFP reporter and whether they include  
238 NMPs, we set out to identify YFP<sup>+</sup> cells based on their location and expression of SOX2 and T. Timed-  
239 pregnant *Nkx1.2*CreER<sup>T2</sup>/YFP mice received tamoxifen either at E7.5 (the onset of *Nkx1.2* expression) or  
240 E9.5 (during relocation of axial progenitors to the CNH) to label *Nkx1.2*-expressing cells around these  
241 stages and 24 hours later we analysed the posterior growth zone in the epiblast and tail bud. In embryos  
242 exposed to tamoxifen at E7.5 and analysed at E8.5, most SOX2<sup>+</sup>T<sup>+</sup> cells in the epiblast layer of the NSB  
243 and CLE were also YFP<sup>+</sup>. This suggests that *Nkx1.2*CreER<sup>T2</sup>/YFP labels putative NMPs (Figure 4A). As  
244 would then be expected, YFP<sup>+</sup> cells were also found in the neural plate (SOX2<sup>+</sup>T<sup>-</sup>), ingressing mesoderm,  
245 and paraxial mesoderm (SOX2<sup>-</sup>T<sup>+</sup>) (Figure 4A). Additionally, a few YFP<sup>+</sup> cells were found in intermediate  
246 and lateral plate mesoderm as well as prospective surface ectoderm (Figure 4A). These findings indicated  
247 that the *Nkx1.2*-expressing cell population in the epiblast around E7.5 is heterogeneous, composed of  
248 NMPs and early neural and paraxial mesoderm progenitors, lateral plate and intermediate mesoderm  
249 progenitors, as well as a few endoderm-fated progenitors. In embryos exposed to tamoxifen at E9.5 and  
250 analysed at E10.5, a subset of YFP<sup>+</sup> cells co-expressed SOX2 and T in the dorsal half of the CNH,  
251 including the neural tube and the NML (Figure 4B). YFP<sup>+</sup> cells were, however, absent from the notochord  
252 component of the CNH (SOX2<sup>+</sup>T<sup>high</sup> cells) and from hindgut precursors and the hindgut proper (also  
253 SOX2<sup>+</sup>T<sup>+</sup>). Besides the CNH, YFP<sup>+</sup> SOX2<sup>+</sup>T<sup>+</sup> cells populated the contiguous tail bud mesenchyme (Figure  
254 4B) and YFP<sup>+</sup> cells contributed to NMP lineages: most newly formed neural tube and paraxial mesoderm  
255 (Figure 5). Overall, using the *Nkx1.2*CreER<sup>T2</sup>/YFP reporter it is possible to specifically label axial  
256 progenitors, including NMPs and their most immediate descendants, at specific developmental stages.  
257 This short tracing experiments also suggested that the *Nkx1.2*-expressing cell population is dynamic,  
258 changing lineage contributions as development proceeds.

259

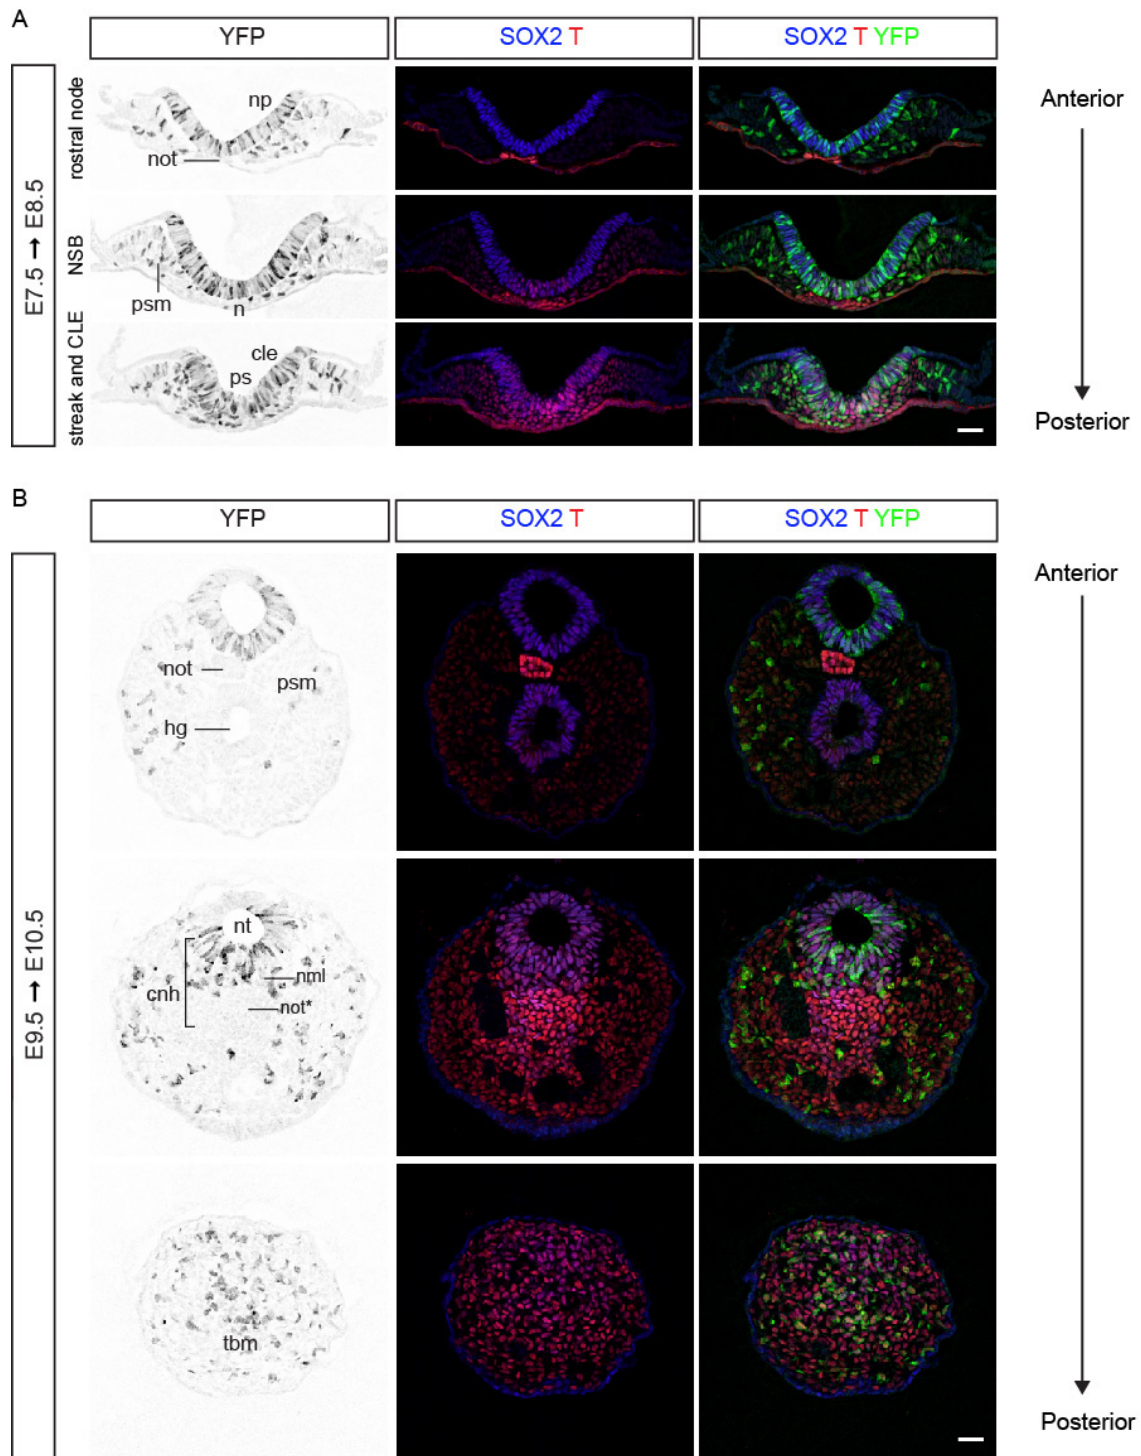

260

261 **Figure 4 A subset of *Nkx1.2*-expressing cells and/or their progeny express SOX2 and T.** (A) Transverse  
 262 sections through the rostral node, NSB, and CLE of an E8.5 *Nkx1.2*CreER<sup>T2</sup> embryo that was exposed to  
 263 tamoxifen at E7.5 and immunolabelled for SOX2, T, and YFP. (n=7 embryos). (B) Transverse sections through  
 264 the tail end of an E10.5 *Nkx1.2*CreER<sup>T2</sup> embryo that was exposed to tamoxifen at E9.5 and immunolabelled for  
 265 SOX2, T, and YFP (n=9 embryos). Abbreviations are the same as in Figure 1. nmi, neuromesodermal lip. Scale  
 266 bars, 50 μm.

267

#### 268 **Early *Nkx1.2*-expressing cells contribute to all three germ layers**

269 To investigate the long-term contribution of early *Nkx1.2*-expressing cells and their progeny to the  
 270 developing embryo, timed-pregnant *Nkx1.2*CreER<sup>T2</sup>/YFP mice received a single dose of tamoxifen at E7.5

271 and the contribution of YFP<sup>+</sup> cells was assessed in embryos at progressively later developmental stages.  
272 Assessment of embryos at E8.5 revealed scattered single cells across the presumptive midbrain/anterior  
273 hindbrain as the anterior limit of cells derived from *Nkx1.2*-expressing cells (Figure 5A, Aa). YFP<sup>+</sup> cells  
274 were found contiguously in the neural tube from the presumptive posterior hindbrain (Figure 5A, Ab) and  
275 then, more posteriorly, throughout the CLE and primitive streak (Figure 5A, Ad-Ag). YFP<sup>+</sup> cells were also  
276 present in derivatives of the primitive streak: the recently ingressed mesoderm and most recently formed  
277 presomitic mesoderm, but were absent from the first 4-5 somites (Figure 5Ad-Ag). At the posterior end of  
278 the embryo, a few YFP<sup>+</sup> cells also contributed to intermediate mesoderm and lateral plate mesoderm  
279 compartments as well as the allantois (Figure 5A, 5Af-Ag). YFP<sup>+</sup> cells were consistently absent from the  
280 notochord (Figure 5A, Ac).

281

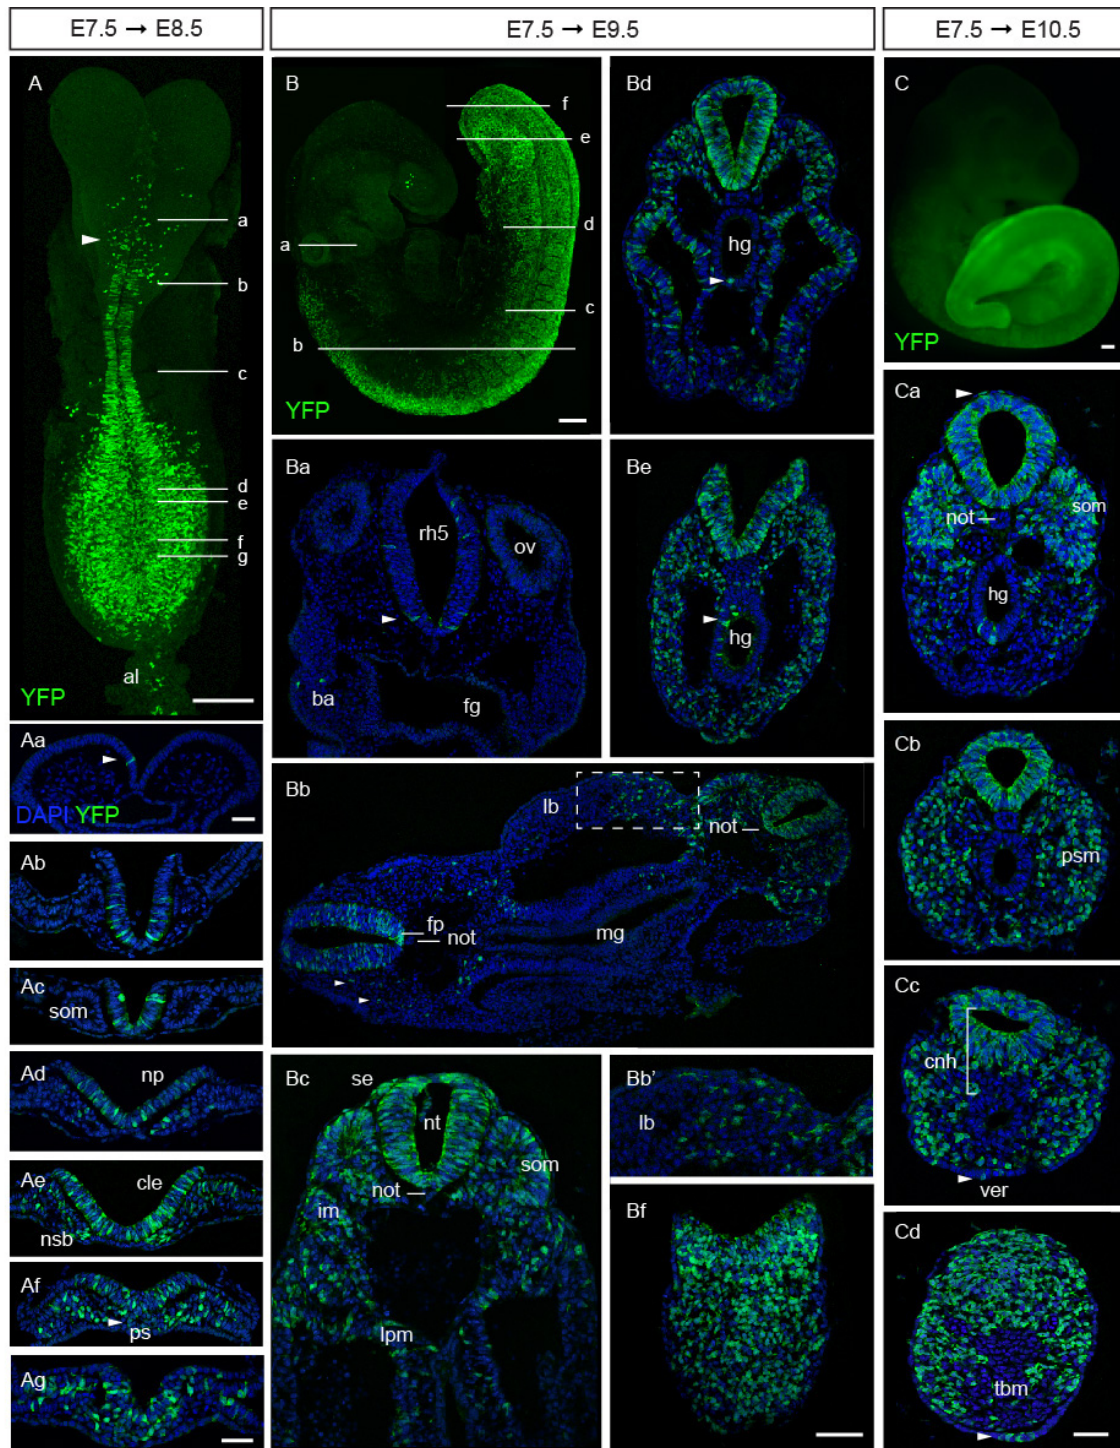

282

283 **Figure 5 Lineage tracing of cells expressing *Nkx1.2* at E7.5.** Timed-pregnant *Nkx1.2CreER<sup>T2</sup>* mice received  
 284 tamoxifen at E7.5 and the contribution of YFP<sup>+</sup> cells to developing embryos assessed at E8.5, E9.5, and E10.5.  
 285 Maximum intensity projection (MIP) of an E8.5 embryo immunolabelled for YFP on whole-mount (n=7 embryos).  
 286 The arrowhead marks the presumptive midbrain/anterior hindbrain boundary. (Aa-Ag) Transverse sections  
 287 through the regions indicated in A (n=8 embryos). (B) MIP of an E9.5 embryo immunolabelled for YFP on whole-  
 288 mount (n=12 embryos). (Ba-Bf) Transverse sections through the regions indicated in B (n=8 embryos). (Ba) At  
 289 the level of the otic vesicles (ov) and rhombomere 5 (rh5) scattered YFP<sup>+</sup> cells were found in the neural tube  
 290 (arrowhead). A few YFP<sup>+</sup> cells populated the branchial arches (ba). The foregut (fg) was, however, always  
 291 unlabelled. (Bb) Section comprising the anterior (left) and posterior (right) levels of the trunk. YFP<sup>+</sup> cells located  
 292 mostly in the floor plate (fp) of the neural tube at more anterior levels, but spanned the dorsoventral extent of the  
 293 more posterior neural tube. YFP<sup>+</sup> cells generated neural crest cells (arrowheads), contributed to posterior  
 294 somites, and to limb bud (lb) mesenchyme. YFP<sup>+</sup> cells were absent from notochord (not) and midgut (mg). (Bb')  
 295 Higher magnification of limb bud mesenchyme in Bb (dashed box). (Bc) YFP<sup>+</sup> cells contributed to the neural tube  
 296 (nt), somites (som), intermediate mesoderm (im), lateral plate mesoderm (lpm), and surface ectoderm (se). (Bd,  
 297 Be) YFP<sup>+</sup> cells were found frequently in the hindgut (hg) (arrowhead). (Bf) YFP<sup>+</sup> cells extended to the caudal

298 epiblast and underlying mesenchyme. (C) Widefield fluorescence image of an E10.5 embryo that received  
299 tamoxifen at E7.5. Most of the posterior body derived from YFP<sup>+</sup> cells at this stage (n=7 embryos). (Ca) YFP<sup>+</sup>  
300 cells made most of the neural tube and somites (som) and also contributed to hindgut (hg) endoderm and  
301 surface ectoderm (arrowhead), but were absent from the notochord (not). (Cb) Posterior to Ca, most presomitic  
302 mesoderm (psm) is YFP<sup>+</sup>. (Cc) Besides in the neural tube and paraxial mesoderm, YFP<sup>+</sup> cells were found in the  
303 NML in the CNH (cnh) region. YFP<sup>+</sup> cells were also present in the VER (ver, arrowhead). (Cd) The tail bud  
304 mesenchyme (tbn) except the ventral-medial cell group was YFP<sup>+</sup>. The images are representative images of  
305 each stage and anterioposterior level. Scale bars, 100 μm on whole-mount; 50 μm on transverse sections.

306

307           A day later, in E9.5 embryos, again a few scattered cells were located in the midbrain and the  
308 roof of the anterior hindbrain as well as the developing eye (Figure 5B). The anterior limit of contiguous  
309 YFP labelling was now clearly located in the hindbrain just anterior to the otic vesicle in rhombomere 5  
310 (Figure 5B). More posteriorly, YFP<sup>+</sup> cells were concentrated ventrally, in the floor plate of the spinal cord  
311 (Figure 5Ba, Bc). This finding suggests that the floor plate of the trunk spinal cord originates from cells  
312 expressing *Nkx1.2*, probably the dorsal layer of the node (see Figure 1Eb), as indirectly suggested by the  
313 combined results of earlier cell labelling studies (Beddington, 1994; Sulik et al., 1994). From forelimb levels  
314 to the posterior end of the embryo, YFP<sup>+</sup> cells were found throughout the dorsoventral extent of the neural  
315 tube, in somites and their derivatives (Figure 5Bb, Bc). YFP<sup>+</sup> cells also contributed extensively to  
316 intermediate and lateral plate mesoderm (Figure 5B, Bc). Mesenchymal cells derived from the lateral plate  
317 mesoderm could be seen migrating in to the limb bud (Figure 5Bc). From forelimb levels, YFP<sup>+</sup> cells also  
318 appeared in the surface ectoderm (Figure 5Bc-Bf) and as streams of neural crest cells emerging from the  
319 dorsal neural tube (Figure 5Bc). YFP<sup>+</sup> cells were absent from the first 4-5 somites, but contributed to both  
320 medial and lateral compartments of the posterior-most 11 to 12 somites (Figure 5B, Bb, Bd). YFP<sup>+</sup> cells did  
321 not contribute to the notochord (Figure 5Ba-c), although a few isolated YFP<sup>+</sup> cells were found in the  
322 notochord of one embryo. This finding argues against a common source of floor plate and notochord after  
323 E7.5 and agrees with grafting and cell labelling experiments that indicated that the ventral node, which  
324 does not express *Nkx1.2* (see Figure 1Eb), is the source of trunk notochord (Beddington, 1994; Brennan et  
325 al., 2002; Yamanaka et al., 2007). In all E9.5 embryos examined, YFP<sup>+</sup> cells were absent from the fore-  
326 and midgut (Figure 5Ba-Bc), but frequently found in the hindgut (Figure 5Bd, Be). At the posterior end of  
327 the embryo, YFP<sup>+</sup> cells made most of the posterior neuropore and underlying mesenchyme (Figure 5Bc-  
328 Bf).

329           Overall, these lineage tracing studies show that the majority of descendants of E7.5 *Nkx1.2*-  
330 expressing cells contribute to the neural and mesodermal tissues of the trunk, including paraxial,  
331 intermediate, and lateral plate mesoderm as well as to the extraembryonic allantois; and that at least some  
332 E7.5 *Nkx1.2*-expressing cells and/or their progeny are retained at the growing end of the embryo.  
333 Interestingly, a recent study derived NMP-like cells in a dish that resemble the caudal epiblast of the  
334 embryo at the time of emergence of the node (around E7.5, coinciding with the emergence of the *Nkx1.2*-  
335 expressing cell population) and found that such *in vitro* NMP-like cells possess the potential to differentiate  
336 not only into neural and paraxial mesoderm cells but also into intermediate and lateral plate mesoderm  
337 (Edri et al., 2018). These findings confirm that such a multipotent progenitor cell population exists in the  
338 embryo within the E7.5 epiblast and can be identified by the expression of *Nkx1.2*. In addition to neural  
339 and mesodermal tissues, we found descendants of early *Nkx1.2*-expressing cells contributing to neural  
340 crest, surface ectoderm, and hindgut endoderm.

341           Between E9.5 and E10.5, axial progenitors complete trunk formation and begin forming a tail from  
342 the tail bud region. In E10.5 *Nkx1.2*CreER<sup>T2</sup>/YFP embryos exposed to tamoxifen at E7.5, YFP<sup>+</sup> cells made  
343 up most of the neural tube and paraxial mesoderm/somites of the tail (Figure 5C, 5Ca-Cd). Posteriorly,  
344 YFP<sup>+</sup> cells populated the dorsal half of the CNH (Figure 5Cc) and the presomitic mesoderm as well as the

345 tail bud mesenchyme contiguous with these regions (Figure 5Cd). YFP<sup>+</sup> cells were, however, virtually  
346 absent among the cells contiguous with the posterior end of the notochord and the hindgut, in the ventral  
347 compartment of the CNH and the ventral tail bud mesenchyme (Figure 5Cd). YFP<sup>+</sup> cells were found very  
348 rarely in the tail notochord and occasionally in the hindgut (Figure 5C, Ca-c). A few YFP<sup>+</sup> cells contributed  
349 to surface ectoderm and to the ventral ectodermal ridge (VER) (Figure 5Cc). This long-term lineage tracing  
350 experiment indicates that cells that expressed *Nkx1.2* at E7.5 and/or their progeny persist in the posterior  
351 end of the embryo from where they continue generating the neural and paraxial mesoderm tissues of the  
352 tail.

353

#### 354 **Late *Nkx1.2*-expressing cells continue to make neural and mesodermal tissues from the tail bud**

355 To test whether the *Nkx1.2*-expressing cell population in the tail bud retains neural and paraxial mesoderm  
356 potential, timed-pregnant *Nkx1.2CreER<sup>T2</sup>/YFP* mice received tamoxifen at E10.5 and embryos were  
357 assessed 24 or 48 hours later. In E11.5 embryos, YFP<sup>+</sup> cells were indeed found in the neural tube and in  
358 the paraxial mesoderm as well as in the tail bud mesenchyme (Figure 6). YFP<sup>+</sup> cells in the neural tube  
359 extended from the tail bud to axial levels right below the hindlimb (opposite to somite ~36), where the  
360 transition from trunk to tail development and from primary to secondary neurulation takes place (Shum et  
361 al., 2010). YFP<sup>+</sup> cells in the paraxial mesoderm were found more posteriorly, in newly generated  
362 presomitic mesoderm (Figure 6). This different distribution of YFP<sup>+</sup> cells in the neural tube and paraxial  
363 mesoderm likely reflects the broader expression of *Nkx1.2* in the neural tube (Figure 1G). *Nkx1.2*-  
364 expressing cells labelled at E9.5 did not contribute to surface ectoderm or the hindgut (Figure 4B) and, as  
365 expected, cells labelled at E10.5 did not contribute to these tissues in E11.5 embryos either (Figure 6).  
366 The latter is consistent with lineage tracing of single cells (Lawson et al., 1991; Lawson and Pedersen,  
367 1992) and of cell groups (Tam and Beddington, 1987; Wilson and Beddington, 1996) in the early primitive  
368 streak which all indicate that the gut endoderm lineage derives from epiblast cells prior to E8.5. Analysis of  
369 E12.5 embryos 48 hours after tamoxifen administration confirmed that cells expressing *Nkx1.2* at E10.5  
370 contribute to both the neural tube and paraxial mesoderm/somites of the tail, while being retained at the  
371 posterior end of the embryo (Figure 6B). These findings indicate that the *Nkx1.2*-expressing cell population  
372 retains the potential to generate neural and paraxial mesoderm tissues and to self-renew until the end of  
373 body axis elongation. An outstanding question, however, is whether the *Nkx1.2*-expressing cell population  
374 undergoes progressive lineage restrictions or whether different axial progenitors are “recruited” in-demand  
375 as the embryo elongates.

376 Taken all together, this study shows that *Nkx1.2*-expressing cells comprise a heterogeneous and  
377 changing cell population with self-renewing capability that generates most trunk and tail tissues in the  
378 mouse.

379

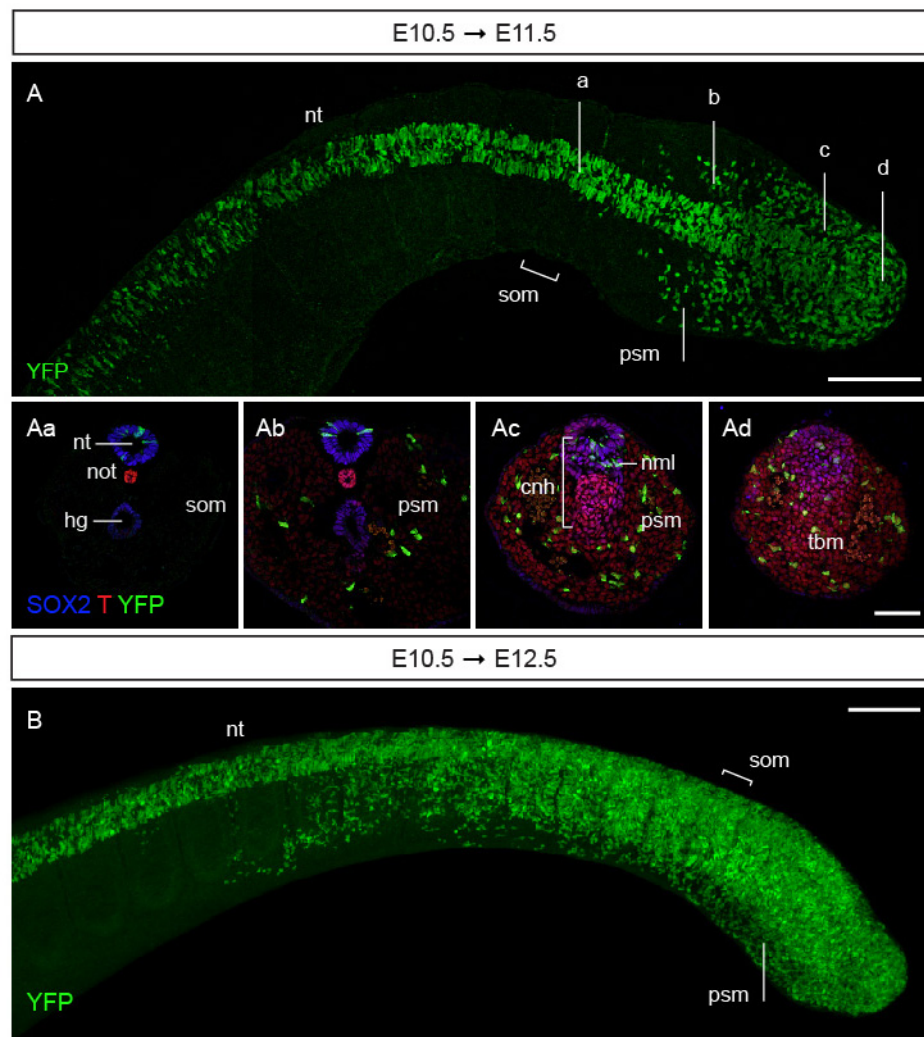

380

381 **Figure 6 Lineage tracing of cells expressing *Nkx1.2* at E10.5.** Timed-pregnant *Nkx1.2*CreER<sup>T2</sup> mice received  
 382 tamoxifen at E10.5 and the contribution of YFP<sup>+</sup> cells to developing embryos assessed at E11.5 (A) and E12.5  
 383 (B). (A) Dorsal view (maximum intensity projection, MIP) of the tail of a E11.5 embryo immunolabelled for YFP on  
 384 whole-mount (n=7 embryos). (Aa-Ad) Transverse sections representative of the levels indicated in (A) and  
 385 immunolabelled for SOX2, T, and YFP (n=9 embryos). YFP<sup>+</sup> cells contributed to the secondary neural tube (see  
 386 Aa-Ad), presomitic mesoderm (Ab-Ad), and tail bud mesenchyme (Ad). (B) Side view (MIP) of the tail of a E12.5  
 387 embryo immunolabelled for YFP on whole-mount (n=9 embryos). Abbreviations are the same as in Figure 1.  
 388 Scale bars, 100  $\mu$ m on whole-mount; 50  $\mu$ m on transverse sections.

389

390

## 391 Discussion

392 Axial progenitors, including NMPs, have proven challenging to study in the developing mouse embryo  
 393 because they comprise a relatively small (Wymeersch et al., 2016), dynamic (this study and (Aires et al.,  
 394 2016; Gouti et al., 2017; Javali et al., 2017; Koch et al., 2017)), and transient cell population. Lineage  
 395 tracing studies using dye labelling or grafting small groups of cells can be imprecise because of the close  
 396 proximity between various types of progenitors and extensive cell mixing in the rapidly growing embryo. A  
 397 complementary approach is to use transgenic reporter mice to label and manipulate specifically  
 398 progenitors *in vivo*. An important limitation of this, however, is that the promoters/Cre driver lines used so  
 399 far have not been shown to specifically target NMPs or just axial progenitors (Garriock et al., 2015; Javali  
 400 et al., 2017; Jurberg et al., 2013; Wymeersch et al., 2016).

401

402 ***Nkx1.2* marks axial progenitors including NMPs and early neural and mesodermal progenitors**

403 This study puts forward *Nkx1.2* as a consistent marker of the posterior growth zone in the elongating  
404 mouse embryo – where axial progenitors, including the NMPs and early neural and mesodermal  
405 progenitors reside.

406 We have shown that *Nkx1.2* expression overlaps with NMP regions: with the NSB epiblast and  
407 adjacent CLE during trunk development and later with the CNH of the tail bud (Cambray and Wilson, 2007;  
408 Wymeersch et al., 2016). *Nkx1.2* is also expressed at lower levels around these regions, in early neural  
409 and mesodermal progenitors (Figure 1). Our characterisation of the *Nkx1.2* region in the E8.5 embryo has  
410 identified cell populations with molecular signatures of early NMPs and early neural and mesodermal  
411 progenitors (Chalamalasetty et al., 2014; Gouti et al., 2017; Koch et al., 2017). Interestingly, *Nkx1.2*  
412 expression at the posterior end of the E8.5 embryo much resembles the region of transcriptional activity of  
413 the *Sox2 N1* enhancer, which is active in NMPs (Takemoto et al., 2011) and it seems, progenitor regions  
414 with NM potential (Wymeersch et al., 2016). The *Sox2 N1* enhancer and *Nkx1.2* expression are both  
415 promoted by Fgf signalling (Delfino-Machín et al., 2005; Sasai et al., 2014; Takemoto et al., 2011), which  
416 acts together with Wnt signalling to regulate and maintain the NMP pool (Garriock et al., 2015; Jurberg et  
417 al., 2014; Wymeersch et al., 2016). This further suggests that the expression of *Nkx1.2* marks the axial  
418 progenitor state. Importantly, once the tail bud has formed cells that co-express *Nkx1.2*, SOX2 and T now  
419 all express TBX6, and so have the molecular signature that distinguishes primitive streak epiblast at E8.5  
420 (Javali et al., 2017) (see Figure S2). This has recently been suggested to represent a transition state in  
421 NMPs undergoing lineage choice (Gouti et al., 2017 ; Javali et al., 2017; Koch et al., 2017) and would be in  
422 line with the loss of the pluripotency factor *Oct4* in progenitors relocated to the tail bud (Aires et al., 2016).  
423 Because TBX6 represses the activity of the *Sox2 N1* enhancer associated with the NMP state, it would be  
424 interesting to see whether this regulatory element is repressed in the tail bud or if it remains active in the  
425 cells that express *Nkx1.2*.

426 Together these findings indicate that the composition of the *Nkx1.2*-expressing cell population  
427 changes as axial progenitor populations emerge and most distinctly, when part of the *Nkx1.2* expressing  
428 cell population is internalised in the tailbud.

429

430 ***Nkx1.2*-expressing cells generate most of the tissues of the trunk and tail**

431 To access genetically the *Nkx1.2*-expressing cell population in the embryo and at different developmental  
432 stages, we have generated the *Nkx1.2CreER<sup>T2</sup>* transgenic mouse line. By crossing this *Nkx1.2CreER<sup>T2</sup>*  
433 mouse to a R26R-EYFP reporter (Srinivas et al., 2001) we have traced the contributions of the *Nkx1.2*-  
434 expressing cell population to trunk and tail development. Our long-term lineage tracing experiments  
435 showed that the *Nkx1.2*-expressing cell population in the E7.5 epiblast includes progenitors for most trunk  
436 tissues: neuroectoderm and all mesoderm tissues (paraxial, intermediate and lateral plate mesoderm)  
437 except axial mesoderm (notochord); and some progenitors for the posterior-most gut endoderm (hindgut)  
438 (Figure 5). In these experiments, cells that had expressed *Nkx1.2* remained at the posterior end of the  
439 embryo and relocated to the tail bud, confirming their self-renewing capability and thus the presence of  
440 long-term axial progenitors within the *Nkx1.2*-expressing cell population. Lineage tracing *Nkx1.2*-  
441 expressing cells in the tail bud showed that this progenitor pool continues to generate the neural and  
442 paraxial mesoderm tissues of the tail; but not notochord, hindgut, or surface ectoderm (Figure 6). This is in  
443 agreement with earlier lineage tracing studies labelling or grafting small groups of cells in this region  
444 (Cambray and Wilson, 2007; McGrew et al., 2008). The lineage restriction of the *Nkx1.2*-expressing cell



445 population likely reflects the response of progenitors to the changing environment and tissue requirements  
446 in the elongating embryo. For example, when the transition to tail development is taking place, lateral and  
447 intermediate mesoderm progenitors differentiate/are used up to generate the hindlimbs and ventral lateral  
448 mesoderm of the trunk (Jurberg et al., 2013).

449 Taken together, these findings indicate that *Nkx1.2*-expressing cells comprise a self-renewing  
450 and changing progenitor cell population that generates most tissues of the trunk and tail. The  
451 *Nkx1.2CreER<sup>T2</sup>* transgenic mouse line provides now the opportunity to dissect how these progenitors form  
452 the posterior body in the developing mouse embryo. For example, crossing the *Nkx1.2CreER<sup>T2</sup>* mouse line  
453 with a conditional multicolour reporter such as the R26R-Confetti mouse (Snippert et al., 2010) may prove  
454 a useful tool to accurately investigate the contributions of single axial progenitors. Crossing the  
455 *Nkx1.2CreER<sup>T2</sup>* mouse line, with conditional knock-in or knock-out mice is already providing new  
456 mechanistic insights into how this important cell population is directed to form trunk and tail tissues at the  
457 right place and time (Mastromina et al., 2017; Nikolopoulou et al., 2017; Rolo et al., 2016).

## 458 **Materials and methods**

### 459 **Mice and tamoxifen administration**

460 Wild-type CD-11 and C567BL/6J mouse strains and transgenic lines Nkx1.2CreER<sup>T2</sup>, R26R-EYFP  
461 (Srinivas et al., 2001), Nkx1.2CreER<sup>T2</sup>/YFP were maintained on a 14-hours light/10-hours dark cycle. For  
462 timed matings, the morning of the plug was considered E0.5. To make a tamoxifen stock solution,  
463 tamoxifen powder (Sigma T5648) was dissolved in vegetable oil to a final concentration of 40 mg/ml and  
464 sonicated to bring to solution. The tamoxifen stock solution was stored at -20 °C for up to three months. At  
465 various stages of pregnancy, Nkx1.2CreER<sup>T2</sup>/YFP females were given a single 200 µl dose of tamoxifen  
466 (of the 40 mg/ml stock) via oral gavage. Mice were monitored for 6 hours and when required sacrificed  
467 following schedule 1 of the Animals (Scientific Procedures) Act of 1986. Embryos were dissected in ice-  
468 cold PBS and fixed in ice-cold 4% paraformaldehyde (PFA) for 2 hours (for immunofluorescence) or  
469 overnight (for RNA *in situ* hybridization). Gastrula embryos were staged according to (Downs and Davies,  
470 1993) and at later stages by standard morphological criteria. All animal procedures were performed in  
471 accordance with UK and EU legislation and guidance on animal use in bioscience research. The work was  
472 carried out under the UK project license 60/4454 and was subjected to local ethical review.

473

### 474 **Genotyping**

475 Genotyping by standard methods was performed to maintain the homozygous line using the following PCR  
476 conditions: 95°C, 5 min and then 95°C, 30s; 60°C, 30 s; 72°C, 1 min for 35 cycles followed by 72°C, 10  
477 min. A DNA quality control and a test reaction were carried out in parallel for the KI allele, the wild-type  
478 (WT) allele, and the Flpe deleter (TG) using the following primer pairs:

479 KI primer 1: 5'ACGTCCAGACACAGCATAGG 3', primer 2: 5'TCACTGAGCAGGTGTTTCAGG 3' (fragment  
480 size 279 bp); QC primer 3: 5'GAGACTCTGGCTACTCATCC 3'; primer 4:  
481 5'CCTTCAGCAAGAGCTGGGGAC 3' (fragment size 585 bp); WT primer 5:  
482 5'CAAGGTTTATTGGTAGCCTGG 3', primer 6: 5'TGAGCCAGTCAGAGTTGTGG 3' (fragment size 176  
483 bp); QC primer 7: 5'GTGGCACGGAATTCTAGTC, primer 8: 5'CTTGTCAAGTAGCAGGAAGA 3'  
484 (fragment size 335 bp); TG primer 9: 5'GGCAGAAGCACGCTTATCG 3', primer 10:  
485 5'GACAAGCGTTAGTAGGCACAT 3' (fragment size 343 bp); QC primer 3 as above, QC P4 as above  
486 (fragment size 585 bp).

487

### 488 **RNA *in situ* hybridization**

489 Standard methods were used to carry out mRNA *in situ* hybridisation in wild type CD-1 and C57BL/6J  
490 (Charles River) mouse embryos (Wilkinson and Nieto, 1993). The *Nkx1.2* plasmid was kindly provided by  
491 Frank Schubert. This probe includes the homeobox domain and the 3' half of the gene (nucleotides 504-  
492 1057).

493

### 494 **Immunofluorescence and imaging**

495 Embryos were permeabilised by dehydration in an increasing methanol series (25% methanol/PBS, 50%  
496 methanol/PBS, 75% methanol/PBS, 100% methanol), then stored in 100% methanol at -20 °C; or  
497 bleached in 3% H<sub>2</sub>O<sub>2</sub>/methanol and gradually rehydrated in PBS in preparation for immunofluorescence.  
498 For whole-mount immunofluorescence, whole embryos were blocked in PBS/0.1% Triton X-100 (PBST)  
499 and 10% normal donkey serum (NDS) for 4 hours and incubated with primary antibodies in PBST/NDS

500 (1:500) overnight at 4 °C. After incubation with primary antibodies, embryos were washed extensively in  
501 PBST (throughout the day or to the next day) and then incubated with secondary antibodies (1:500) and  
502 and DAPI (1 mg/ml stock solution diluted 1:500) in PBST/10% NDS overnight at 4 °C. Embryos were then  
503 washed extensively for 24 hours and prepared for clearing. For BABB (2:1 benzyl alcohol:benzyl  
504 benzoate) clearing, embryos were first dehydrated in an increasing methanol series (25% methanol/PBS,  
505 50% methanol/PBS, 75% methanol/PBS, 100% methanol. 5 minutes each), then put in 1:1 (v/v)  
506 methanol:BABB for 5 minutes and twice in BABB for clearing. BABB-cleared embryos were mounted in  
507 BABB for imaging. For immunofluorescence on cryosections, embryos were cryoprotected in 30%  
508 sucrose/PBS overnight at 4 °C, mounted in agar blocks (1.5% agar/5% sucrose/PBS), and frozen on dry  
509 ice. 16 µm-thick sections were cut on a Leica CM1900 cryostat, mounted on adhesion slides, and dried for  
510 several hours at room temperature. Slides were then washed three times in PBST and blocked in  
511 PBST/10% NDS at room temperature. After at least 1 hour, sections were incubated with primary  
512 antibodies in PBST/10% NDS overnight at 4 °C. After several PBST washes, sections were incubated with  
513 secondary antibodies and DAPI in PBST/10% NDS for 2 hours at room temperature or overnight at 4 °C.  
514 After several PBST washes, slides were mounted with SlowFade Gold antifade mountant (Invitrogen,  
515 S36936) for imaging.

516 Primary antibodies and working dilutions used were: chicken anti-GFP (Abcam, ab13970; 1:500),  
517 goat anti-GFP (Abcam, ab6673; 1:500), rabbit anti-SOX2 (Millipore, AB5603; 1:500), goat anti-SOX2  
518 (Immune Systems, GT15098; 1:500), goat anti-Brachyury/T (R&D Systems, AF2085; 1:500), goat anti-  
519 TBX6 (R&D Systems, AF4744; 1:200). Secondary antibodies used, all at a1:500 working dilution, were:  
520 donkey anti-chicken Alexa Fluor 488 (Abcam, ab150173), donkey anti-goat Alexa Fluor 488 (Life  
521 Technologies, A11055), donkey anti-rabbit Alexa Fluor 568 (Life Technologies, A10042), donkey anti-goat  
522 Alexa Fluor 647 (Life Technologies, A21477).

523 Whole-mount embryos and tissue sections were imaged on a confocal laser scanning microscope  
524 Leica TCS SP8 in the Dundee Imaging Facility. Tissue sections were in some cases scored on a Leica DB  
525 fluorescence microscope or with a DeltaVision imaging system.

526

## 527 **Methodology**

528 The sample size of each experiment is reported in the respective figure legend. In all cases, *n* reflects the  
529 number of embryos analysed per experiment. All experiments were repeated at least twice (so embryos  
530 are from at least two independent litters). No statistical methods were used to predetermine sample size.  
531 The experiments were not randomised and the investigators were not blinded during to the group  
532 allocation or outcome assessment.

533

534

## 535 **Acknowledgements**

536 We thank the University of Dundee WBRUTG and the Dundee Imaging Facility for technical assistance  
537 and advice, Val Wilson and Moisés Mallo for prompt and insightful comments on the preprint version of  
538 this manuscript, and to Alwyn Dady and Ioannis Kasioulis for comments on this final version. Creation of  
539 the Nkx1.2CreER<sup>T2</sup> line and initial characterisation was supported by MRC grant G1100552 (P.A.H. and  
540 K.G.S.). This work was also supported by a Wellcome Trust Senior Investigator Award WT102817 to

541 K.G.S. Microscopes used for imaging were purchased with support from a Multi-User Equipment grant  
542 WT101468 from the Wellcome Trust.

543

544

545 **Author contributions**

546 Conceptualization: A.R.A. and K.G.S; Methodology: A.R.A., P.A. H., K.G.S; Validation: A.R.A. and P.A.H.;  
547 Formal analysis: A.R.A., P. A. H., K.G.S.; Investigation: A.R.A., P.A. H., K.G.S; Resources: K.G.S; Data  
548 Curation: A.R.A.; Writing – original draft preparation: A.R.A., K.G.S; Writing – review and editing: A.R.A.,  
549 P.A. H., K.G.S; Visualization: A.R.A; Supervision: K.G.S; Project administration: K.G.S; Funding  
550 acquisition: K.G.S.

551

552 The authors declare no competing interests.

## 553 References

- 554 Aires, R., Jurberg, A.D., Leal, F., Novoa, A., Cohn, M.J., and Mallo, M. (2016). Oct4 Is a Key Regulator of  
555 Vertebrate Trunk Length Diversity. *Dev Cell* 38, 262-274.
- 556 Bae, Y.K., Shimizu, T., Muraoka, O., Yabe, T., Hirata, T., Nojima, H., Hirano, T., and Hibi, M. (2004).  
557 Expression of sax1/nkx1.2 and sax2/nkx1.1 in zebrafish. *Gene expression patterns : GEP* 4, 481-486.
- 558 Beck, C.W. (2015). Development of the vertebrate tailbud. In *WIREs Dev Biol*, pp. 33-44.
- 559 Beddington, R.S. (1994). Induction of a second neural axis by the mouse node. *Development (Cambridge, England)* 120, 613-620.
- 561 Bober, E., Baum, C., Braun, T., and Arnold, H.H. (1994). A novel NK-related mouse homeobox gene:  
562 expression in central and peripheral nervous structures during embryonic development. *Dev Biol* 162, 288-  
563 303.
- 564 Brennan, J., Norris, D.P., and Robertson, E.J. (2002). Nodal activity in the node governs left-right  
565 asymmetry. *Genes Dev* 16, 2339-2344.
- 566 Cambray, N., and Wilson, V. (2002). Axial progenitors with extensive potency are localised to the mouse  
567 chordoneural hinge. In *Development (Cambridge, England)*, pp. 4855-4866.
- 568 Cambray, N., and Wilson, V. (2007). Two distinct sources for a population of maturing axial progenitors. In  
569 *Development (Cambridge, England)*, pp. 2829-2840.
- 570 Chalamalasetty, R.B., Garriock, R.J., Dunty, W.C., Kennedy, M.W., Jailwala, P., Si, H., and Yamaguchi,  
571 T.P. (2014). Mesogenin 1 is a master regulator of paraxial presomitic mesoderm differentiation. In  
572 *Development (Cambridge, England) (The Company of Biologists Limited)*, pp. 4285-4297.
- 573 Delfino-Machín, M., Lunn, J.S., Breitkreuz, D.N., Akai, J., and Storey, K.G. (2005). Specification and  
574 maintenance of the spinal cord stem zone. In *Development (Cambridge, England) (The Company of*  
575 *Biologists Limited)*, pp. 4273-4283.
- 576 Downs, K.M., and Davies, T. (1993). Staging of gastrulating mouse embryos by morphological landmarks  
577 in the dissecting microscope. In *Development (Cambridge, England)*, pp. 1255-1266.
- 578 Edri, S., Hayward, P., Baillie-Johnson, P., Steventon, B., and Martinez Arias, A. (2018). An Epiblast Stem  
579 Cell derived multipotent progenitor population for axial extension. *bioRxiv*.
- 580 Garriock, R.J., Chalamalasetty, R.B., Kennedy, M.W., Canizales, L.C., Lewandoski, M., and Yamaguchi,  
581 T.P. (2015). Lineage tracing of neuromesodermal progenitors reveals novel Wnt-dependent roles in trunk  
582 progenitor cell maintenance and differentiation. In *Development (Cambridge, England) (The Company of*  
583 *Biologists Limited)*, pp. 1628-1638.
- 584 Gouti, M., Delile, J., Stamataki, D., Wymeersch, F.J., Huang, Y., Kleinjung, J., Wilson, V., and Briscoe, J.  
585 (2017). A Gene Regulatory Network Balances Neural and Mesoderm Specification during Vertebrate  
586 Trunk Development. In *Dev Cell (Elsevier Inc.)*, pp. 1-33.
- 587 Gouti, M., Tsakiridis, A., Wymeersch, F.J., Huang, Y., Kleinjung, J., Wilson, V., and Briscoe, J. (2014). In  
588 Vitro Generation of Neuromesodermal Progenitors Reveals Distinct Roles for Wnt Signalling in the  
589 Specification of Spinal Cord and Paraxial Mesoderm Identity. In *PLoS Biol (Public Library of Science)*, pp.  
590 e1001937.
- 591 Henrique, D., Abranches, E., Verrier, L., and Storey, K.G. (2015). Neuromesodermal progenitors and the  
592 making of the spinal cord. *Development (Cambridge, England)* 142, 2864-2875.
- 593 Javali, A., Misra, A., Leonavicius, K., Acharyya, D., Vyas, B., and Sambasivan, R. (2017). Co-expression  
594 of Tbx6 and Sox2 identifies a novel transient neuromesoderm progenitor cell state. *Development*  
595 *(Cambridge, England)* 144, 4522-4529.
- 596 Jurberg, A.D., Aires, R., Novoa, A., Rowland, J.E., and Mallo, M. (2014). Compartment-dependent  
597 activities of Wnt3a/ $\beta$ -catenin signaling during vertebrate axial extension. In *Developmental Biology*  
598 *(Elsevier)*, pp. 253-263.
- 599 Jurberg, A.D., Aires, R., Varela-Lasheras, I., Novoa, A., and Mallo, M. (2013). Switching axial progenitors  
600 from producing trunk to tail tissues in vertebrate embryos. In *Developmental Cell*, pp. 451-462.
- 601 Kimelman, D. (2016). Tales of Tails (and Trunks): Forming the Posterior Body in Vertebrate Embryos. In  
602 *Curr Top Dev Biol (Elsevier)*, pp. 517-536.
- 603 Koch, F., Scholze, M., Wittler, L., Schifferl, D., Sudheer, S., Grote, P., Timmermann, B., Macura, K., and  
604 Herrmann, B.G. (2017). Antagonistic Activities of Sox2 and Brachyury Control the Fate Choice of Neuro-  
605 Mesodermal Progenitors. *Dev Cell* 42, 514-526.e517.
- 606 Lawson, K.A., Meneses, J.J., and Pedersen, R.A. (1991). Clonal analysis of epiblast fate during germ layer  
607 formation in the mouse embryo. In *Development (Cambridge, England)*, pp. 891-911.
- 608 Lawson, K.A., and Pedersen, R.A. (1992). Clonal analysis of cell fate during gastrulation and early  
609 neurulation in the mouse. *Ciba Found Symp* 165, 3-21; discussion 21-26.

- 610 Lowery, L.A., and Sive, H. (2004). Strategies of vertebrate neurulation and a re-evaluation of teleost neural  
611 tube formation. In *Mechanisms of Development*, pp. 1189-1197.
- 612 Mastromina, I., Verrier, L., Storey, K.G., and Dale, J.K. (2017). MYC activity is required for maintenance of  
613 the Neuromesodermal Progenitor signalling network and for correct timing of segmentation clock gene  
614 oscillations. *bioRxiv*.
- 615 McGrew, M.J., Sherman, A., Lillico, S.G., Ellard, F.M., Radcliffe, P.A., Gilhooley, H.J., Mitrophanous, K.A.,  
616 Cambay, N., Wilson, V., and Sang, H. (2008). Localised axial progenitor cell populations in the avian tail  
617 bud are not committed to a posterior Hox identity. In *Development (Cambridge, England) (The Company of  
618 Biologists Ltd)*, pp. 2289-2299.
- 619 Neijts, R., Simmini, S., Giuliani, F., van Rooijen, C., and Deschamps, J. (2013). Region-specific regulation  
620 of posterior axial elongation during vertebrate embryogenesis. In *Dev Dyn*, pp. 88-98.
- 621 Nikolopoulou, E., Galea, G.L., Rolo, A., Greene, N.D.E., and Copp, A.J. (2017). Neural tube closure:  
622 cellular, molecular and biomechanical mechanisms. In *Development (Cambridge, England)*, pp. 552-566.
- 623 Rangini, Z., Frumkin, A., Shani, G., Guttman, M., Eyal-Giladi, H., Gruenbaum, Y., and Fainsod, A. (1989).  
624 The chicken homeo box genes CHox1 and CHox3: cloning, sequencing and expression during  
625 embryogenesis. *Gene* 76, 61-74.
- 626 Rolo, A., Savery, D., Escuin, S., de Castro, S.C., Armer, H.E., Munro, P.M., Mole, M.A., Greene, N.D., and  
627 Copp, A.J. (2016). Regulation of cell protrusions by small GTPases during fusion of the neural folds. *Elife*  
628 5, e13273.
- 629 Sasai, N., Kutejova, E., and Briscoe, J. (2014). Integration of Signals along Orthogonal Axes of the  
630 Vertebrate Neural Tube Controls Progenitor Competence and Increases Cell Diversity. In *PLoS Biol*, pp.  
631 e1001907-1001920.
- 632 Schoenwolf, G.C. (1984). Histological and ultrastructural studies of secondary neurulation in mouse  
633 embryos. In *Am J Anat*, pp. 361-376.
- 634 Schubert, F.R., Fainsod, A., Gruenbaum, Y., and Gruss, P. (1995). Expression of the novel murine  
635 homeobox gene *Sax-1* in the developing nervous system. *Mech Dev* 51, 99-114.
- 636 Shum, A.S.W., Tang, L.S.C., Copp, A.J., and Roelink, H. (2010). Lack of motor neuron differentiation is an  
637 intrinsic property of the mouse secondary neural tube. In *Dev Dyn (Wiley-Liss, Inc.)*, pp. 3192-3203.
- 638 Snippert, H.J., van der Flier, L.G., Sato, T., van Es, J.H., van den Born, M., Kroon-Veenboer, C., Barker,  
639 N., Klein, A.M., van Rheenen, J., Simons, B.D., *et al.* (2010). Intestinal Crypt Homeostasis Results from  
640 Neutral Competition between Symmetrically Dividing Lgr5 Stem Cells. In *Cell (Elsevier Ltd)*, pp. 134-144.
- 641 Snow, M.H.L. (1977). Gastrulation in the mouse: Growth and regionalization of the epiblast. *Development  
642 (Cambridge, England)* 42, 293-303.
- 643 Spann, P., Ginsburg, M., Rangini, Z., Fainsod, A., Eyal-Giladi, H., and Gruenbaum, Y. (1994). The spatial  
644 and temporal dynamics of *Sax1* (CHox3) homeobox gene expression in the chick's spinal cord. In  
645 *Development (Cambridge, England) (Company of Biologists)*, pp. 1817-1828.
- 646 Srinivas, S., Watanabe, T., Lin, C.-S., Williams, C.M., Tanabe, Y., Jessell, T.M., and Costantini, F. (2001).  
647 Cre reporter strains produced by targeted insertion of EYFP and ECFP into the ROSA26 locus. *BMC  
648 Developmental Biology* 1, 4.
- 649 Steventon, B., and Martinez Arias, A. (2017). Evo-engineering and the cellular and molecular origins of the  
650 vertebrate spinal cord. *Dev Biol* 432, 3-13.
- 651 Sulik, K., Dehart, D.B., Ilangaki, T., Carson, J.L., Vrablic, T., Gesteland, K., and Schoenwolf, G.C. (1994).  
652 Morphogenesis of the murine node and notochordal plate. *Dev Dyn* 201, 260-278.
- 653 Takemoto, T., Uchikawa, M., Yoshida, M., Bell, D.M., Lovell-Badge, R., Papaioannou, V.E., and Kondoh,  
654 H. (2011). Tbx6-dependent Sox2 regulation determines neural or mesodermal fate in axial stem cells. In  
655 *Nature (Nature Publishing Group)*, pp. 394-398.
- 656 Tam, P.P., and Beddington, R.S. (1987). The formation of mesodermal tissues in the mouse embryo  
657 during gastrulation and early organogenesis. In *Development (Cambridge, England) (The Company of  
658 Biologists Ltd)*, pp. 109-126.
- 659 Tsakiridis, A., Huang, Y., Blin, G., Skylaki, S., Wymeersch, F., Osorno, R., Economou, C., Karagianni, E.,  
660 Zhao, S., Lowell, S., *et al.* (2014). Distinct Wnt-driven primitive streak-like populations reflect in vivo  
661 lineage precursors. In *Development (Cambridge, England) (The Company of Biologists Limited)*, pp. 1209-  
662 1221.
- 663 Tsakiridis, A., and Wilson, V. (2015). Assessing the bipotency of in vitro-derived neuromesodermal  
664 progenitors. In *F1000Research*, pp. 1-17.
- 665 Tzouanacou, E., Wegener, A., Wymeersch, F.J., Wilson, V., and Nicolas, J.-F. (2009). Redefining the  
666 progression of lineage segregations during mammalian embryogenesis by clonal analysis. In  
667 *Developmental Cell*, pp. 365-376.

- 668 Verrier, L., Davidson, L., Gierliński, M., and Storey, K.G. (2017). Generation, selection and transcriptomic  
669 profiling of human neuromesodermal and spinal cord progenitors in vitro. bioRxiv.
- 670 Wilkinson, D.G., and Nieto, M.A. (1993). Detection of messenger RNA by in situ hybridization to tissue  
671 sections and whole mounts. *Methods Enzymol* 225, 361-373.
- 672 Wilson, V., and Beddington, R.S. (1996). Cell fate and morphogenetic movement in the late mouse  
673 primitive streak. In *Mechanisms of Development*, pp. 79-89.
- 674 Wilson, V., Olivera-Martinez, I., and Storey, K.G. (2009). Stem cells, signals and vertebrate body axis  
675 extension. In *Development* (Cambridge, England), pp. 1591-1604.
- 676 Wymeersch, F.J., Huang, Y., Blin, G., Cambray, N., Wilkie, R., Wong, F.C., and Wilson, V. (2016).  
677 Position-dependent plasticity of distinct progenitor types in the primitive streak. In *eLife* (eLife Sciences  
678 Publications Limited), pp. 841.
- 679 Yamanaka, Y., Tamplin, O.J., Beckers, A., Gossler, A., and Rossant, J. (2007). Live imaging and genetic  
680 analysis of mouse notochord formation reveals regional morphogenetic mechanisms. *Dev Cell* 13, 884-  
681 896.
- 682
